# Supplementary material for: Deep Learning Predicts the Malignant-Transformation-Free Survival of Oral Potentially Malignant Disorders
Source: MDPI journal article supplement (doi:10.3390/cancers13236054), 2021-12-01
Supplement: s1 [file s1]

## Article

# Deep Learning Predicts the Malignant-Transformation-Free Survival of Oral Potentially Malignant Disorders

John Adeoye <sup>1</sup>, Mohamad Koohi-Moghadam <sup>2</sup>, Anthony Wing Ip Lo <sup>3</sup>, Raymond King-Yin Tsang <sup>4</sup>, Velda Ling Yu Chow <sup>5</sup>, Li-Wu Zheng <sup>1</sup>, Siu-Wai Choi <sup>1</sup>, Peter Thomson <sup>6,\*</sup> and Yu-Xiong Su <sup>1,\*</sup>

**Table S1.** Tuning hyperparameters for the deep learning algorithms.

| Hyperparameters    | Range                                                      |
|--------------------|------------------------------------------------------------|
| Optimizer          | ADAM, SGD                                                  |
| Activation         | Rectifier linear unit (ReLU)                               |
| Hidden layers      | 1–4                                                        |
| Nodes per layer    | 32, 64, 128, 256                                           |
| Dropout            | 0.1–0.3                                                    |
| Batch size         | 64, 128, 256                                               |
| Learning rate (LR) | Hyperparameter search and optimal LR used within the model |
| Alpha (DeepHit)    | 0.2                                                        |
| Sigma (DeepHit)    | 0.1                                                        |

ADAM – Adaptive moment estimation; SGD – Stochastic gradient descent.

**Table S2.** Demographic, clinical, and pathologic characteristics of the external validation cohort.

| Variables                                 |                          | N = 382     |
|-------------------------------------------|--------------------------|-------------|
|                                           |                          | N (%)       |
| Median age (IQR)                          |                          | 58 (50–69)  |
| Gender                                    | Female                   | 166 (43.5)  |
|                                           | Male                     | 216 (56.5)  |
| Patient category                          | NSND                     | Missing     |
|                                           | SD                       |             |
| Continued risk habits following diagnosis | Yes                      | Missing     |
|                                           | No                       |             |
|                                           | Not applicable           |             |
| Previous malignancy                       | Head and neck tumors     | Missing     |
|                                           | Other tumors             |             |
|                                           | Hematologic malignancies |             |
|                                           | No malignancy            |             |
| Charlson comorbidity index – mean (SD)    |                          | Missing     |
| Hypertension                              |                          | Missing     |
| Diabetes mellitus                         |                          | Missing     |
| Hyperlipidemia                            |                          | Missing     |
| Autoimmune disease                        |                          | Missing     |
| Viral hepatitis infection                 |                          | Missing     |
| Lesion                                    | Oral leukoplakia         | 292 (76.4)  |
|                                           | Oral lichenoid lesion    | 90 (23.6)   |
| Clinical subtype of lichenoid lesion      | Reticular / Papular      | 26 (6.8)    |
|                                           | Erosive/Atrophic         | 15 (3.9)    |
|                                           | Plaque                   | 49 (12.8)   |
|                                           | Tongue / FOM             | 263(68.8)   |
| Buccal / Labial mucosa                    |                          | 58 (15.2)   |
| Retromolar area                           |                          | 3 (0.8)     |
| Gingiva                                   |                          | 29 (7.6)    |
| Palate                                    |                          | 45(11.8)    |
| Number of lesions                         | Single                   | Missing     |
|                                           | Bilateral or double      |             |
|                                           | Multiple                 |             |
| Presence of ulcers or erosions            |                          | 61 (16.0)   |
| Induration                                |                          | Missing     |
| Treatment                                 | Surgical excision        | 382 (100.0) |
| Post-excision recurrence                  |                          | 52 (13.6)   |
| Number of recurrences                     | 1                        | 34 (8.9)    |
|                                           | 2                        | 11(2.9)     |
|                                           | 3                        | 4 (1.0)     |
|                                           | 4                        | 2 (0.5)     |
|                                           | 7                        | 1 (0.3)     |
| Oral epithelial dysplasia at diagnosis    | Absent                   | 42 (11.0)   |
|                                           | Mild                     | 113 (29.6)  |
|                                           | Moderate                 | 114 (29.8)  |
|                                           | Severe                   | 113 (29.6)  |
| Oral epithelial dysplasia at follow-up    | Absent                   | 335 (87.7)  |
|                                           | Mild                     | 11(2.9)     |

|                          |          |          |
|--------------------------|----------|----------|
|                          | Moderate | 11 (2.9) |
|                          | Severe   | 17 (4.5) |
|                          | Unknown  | 8 (2.1)  |
| Malignant transformation |          | 22 (5.8) |

IQR – Interquartile range; NSND – nonsmoker non-drinker; SD – smoker and/or drinker; SD – standard deviation; FOM – floor of the mouth; AJCC – American Joint Committee on Cancer.
